# Supplementary material for: Complex calcium carbonate/polymer microparticles as carriers for aminoglycoside antibiotics
Source: Royal Society of Chemistry journal article supplement (doi:10.1039/c8ra03367f), 2018-01-01
Supplement: c8ra03367f1.pdf [file c8ra03367f1.pdf]

## Electronic Supplementary Information

# Complex calcium carbonate/polymer microparticles as carriers for aminoglycoside antibiotics

Stefania Racovita,<sup>1</sup> Ana-Lavinia Vasiliu,<sup>1</sup> Adrian Bele,<sup>1</sup> Dana Schwarz<sup>2</sup>, Christine Steinbach<sup>2</sup>, Regine Boldt,<sup>2</sup> Simona Schwarz<sup>2</sup>, and Marcela Mihai<sup>1\*</sup>

<sup>1</sup>*"Petru Poni" Institute of Macromolecular Chemistry of Romanian Academy, 41A Grigore Ghica Voda Alley, 700487 Iasi, Romania*

<sup>2</sup>*Leibniz-Institut für Polymerforschung Dresden e.V., 6 Hohe Strasse, 01069 Dresden, Germany*

### Corresponding Author

\*Marcela Mihai, Phone: +40.232.217.454; Fax: +40.232.211.299, email: [marcelas@icmpp.ro](mailto:marcelas@icmpp.ro)

### Abstract

Composite microparticles of CaCO<sub>3</sub> and two pectin samples (which differ by the functional group ratio) or corresponding nonstoichiometric polyelectrolyte complexes with different molar ratios (0.5, 0.9 and 1.2) are obtained, characterized and tested for loading and release of streptomycin (STR) and kanamycin (KAN) sulphate. The synthesized carriers were characterized before and after drug loading in terms of morphology (by SEM using secondary electron and energy selective backscattered electron detectors), porosity (by water sorption isotherms) and elemental composition (by elemental mapping using the energy dispersive X-Ray and FTIR spectroscopy). The kinetic of the release mechanism from microparticles was investigated using Higuchi and Korsmeyer-Peppas mathematical models.

**Keywords:** calcium carbonate, pectin, polyelectrolyte complexes, streptomycin, kanamycin

**Scheme 1S.** Chemical structure of polymers [pectins – PCTxx, and poly(allyamine hydrochloride) – PAH] and drugs [streptomycin (STR) and *kanamycin* (KAN)] used in this study

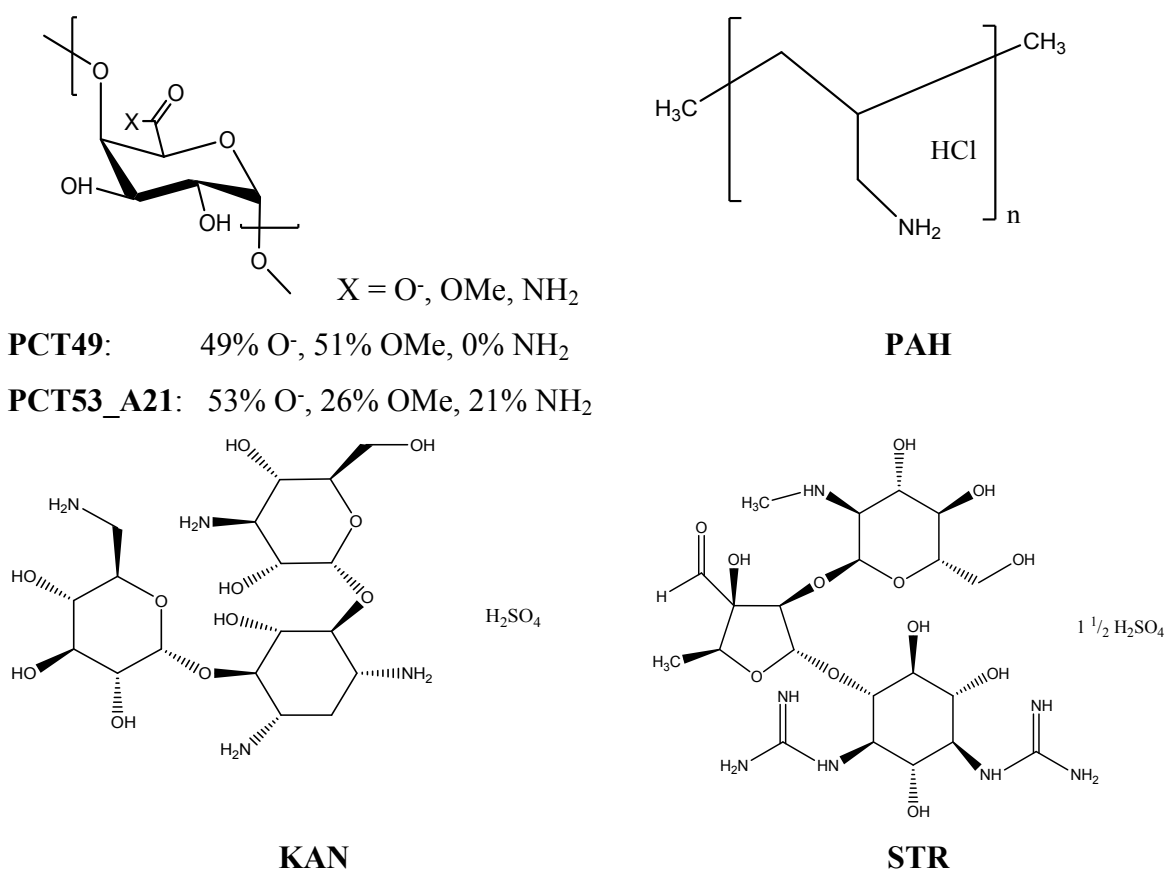

**Table 1S.** Diffusion coefficients for pectin-CaCO<sub>3</sub> and NPEC-CaCO<sub>3</sub> composite microparticles, determined from sorption-desorption experimental data

| Pectin type | NPEC<br>n <sup>+</sup> /n <sup>-</sup> | 10 <sup>-5</sup> K <sub>1</sub> <sup>*</sup> ,<br>M <sub>t</sub> /M <sub>∞</sub> < 0.5 | 10 <sup>-4</sup> K <sub>2</sub> <sup>*</sup> ,<br>M <sub>t</sub> /M <sub>∞</sub> > 0.5 | l<br>(cm) | D <sub>1</sub><br>(10 <sup>-8</sup> cm <sup>2</sup> /s) | D <sub>2</sub><br>(10 <sup>-7</sup> cm <sup>2</sup> /s) |
|-------------|----------------------------------------|----------------------------------------------------------------------------------------|----------------------------------------------------------------------------------------|-----------|---------------------------------------------------------|---------------------------------------------------------|
| PCT49       | 0                                      | 3.00                                                                                   | -5.26                                                                                  | 0.1       | 5.89                                                    | 5.33                                                    |
|             | 0.5                                    | 2.76                                                                                   | -6.88                                                                                  | 0.1       | 5.41                                                    | 6.98                                                    |
|             | 0.9                                    | 2.44                                                                                   | -6.33                                                                                  | 0.1       | 4.79                                                    | 6.41                                                    |
|             | 1.2                                    | 2.49                                                                                   | -6.99                                                                                  | 0.1       | 4.90                                                    | 7.09                                                    |
| PCT53_A21   | 0                                      | 3.71                                                                                   | -5.08                                                                                  | 0.1       | 7.28                                                    | 5.15                                                    |
|             | 0.5                                    | 2.94                                                                                   | -6.44                                                                                  | 0.1       | 5.76                                                    | 6.53                                                    |
|             | 0.9                                    | 5.18                                                                                   | -8.92                                                                                  | 0.1       | 5.18                                                    | 9.04                                                    |
|             | 1.2                                    | 2.06                                                                                   | -5.38                                                                                  | 0.1       | 4.04                                                    | 5.45                                                    |

\*K<sub>1</sub> is slope of linear regression between (t-t<sub>R</sub>) and (M<sub>t</sub>/M<sub>∞</sub>)<sup>2</sup> for (t-t<sub>R</sub>) ≥ 0 and (M<sub>t</sub>/M<sub>∞</sub>)<sup>2</sup> < 0.2 where t<sub>R</sub> is time correlation (minus intercept/slope) for M<sub>t</sub>/M<sub>∞</sub> = 0; K<sub>2</sub> is slope of linear regression between t and ln(1-M<sub>t</sub>/M<sub>∞</sub>) for -1.2 > ln > -3.0

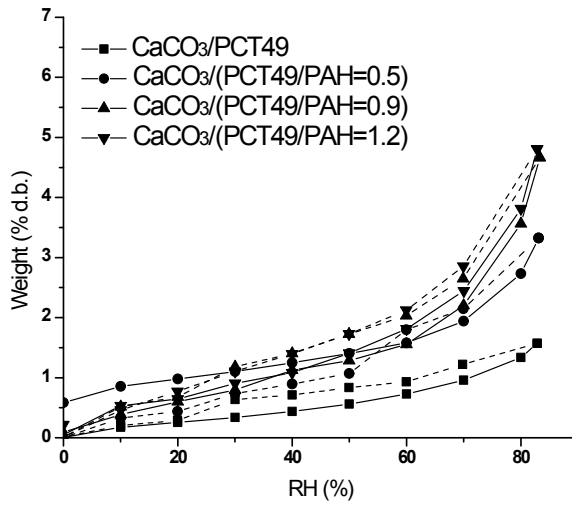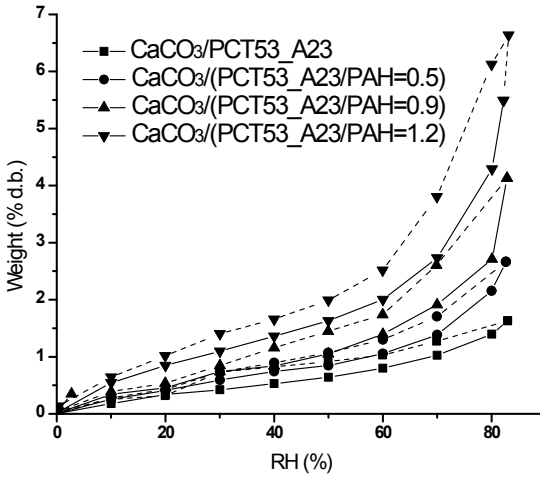

**Figure 1S.** Sorption/desorption isotherms as relative humidity (RH) vs. weight variation

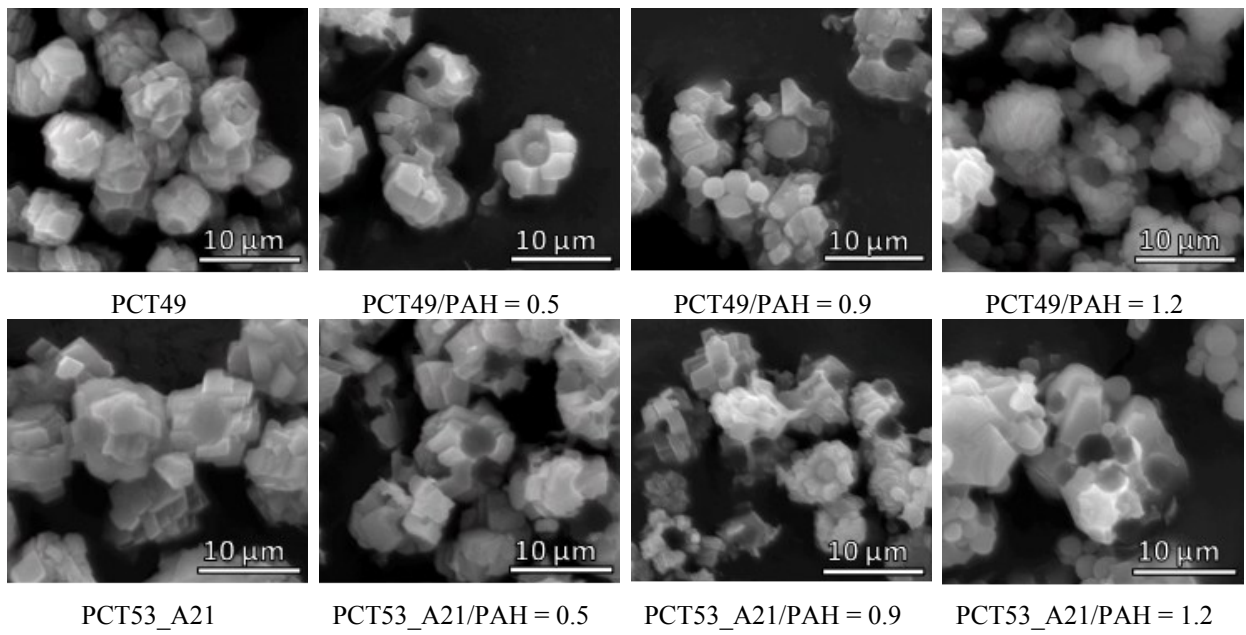

**Figure 2S.** SEM micrograph of pectin-CaCO<sub>3</sub> and NPEC-CaCO<sub>3</sub> microparticles after STR retention

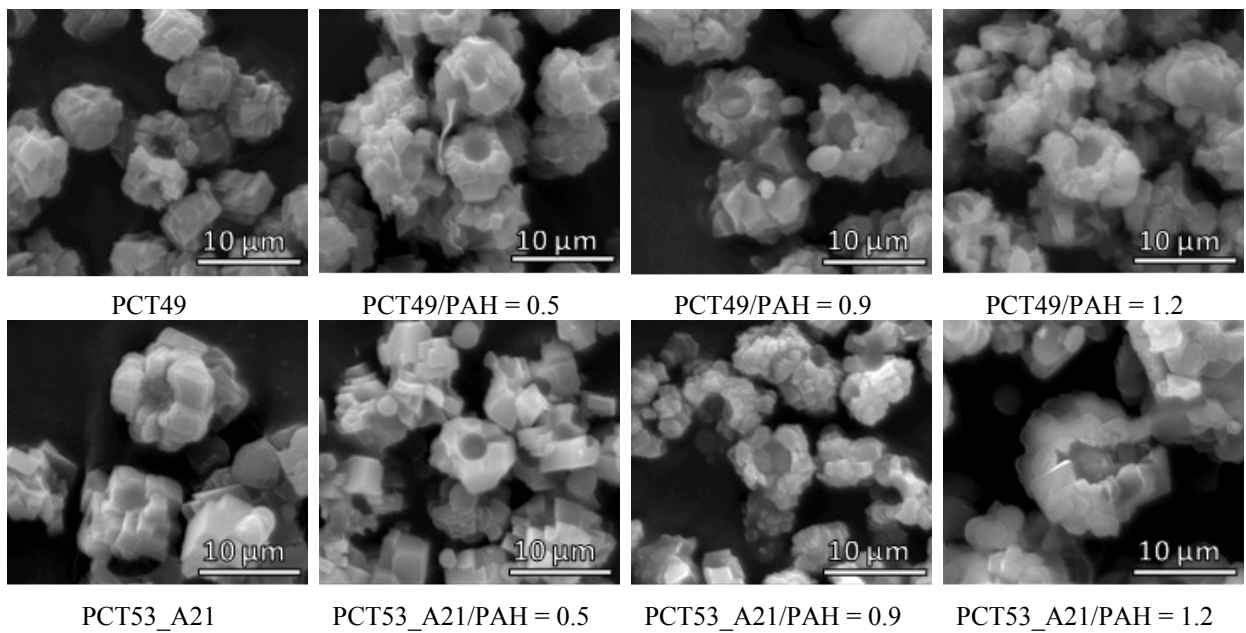

**Figure 3S.** SEM micrograph of pectin-CaCO<sub>3</sub> and NPEC-CaCO<sub>3</sub> microparticles after KAN retention

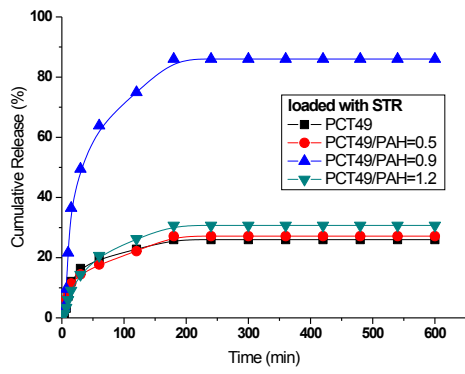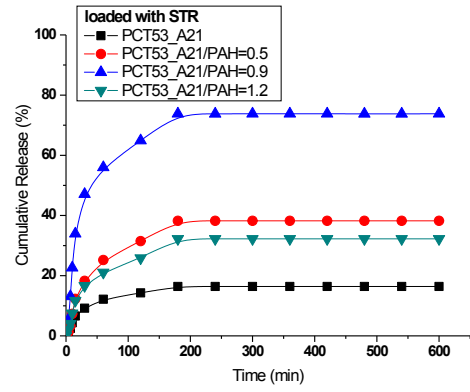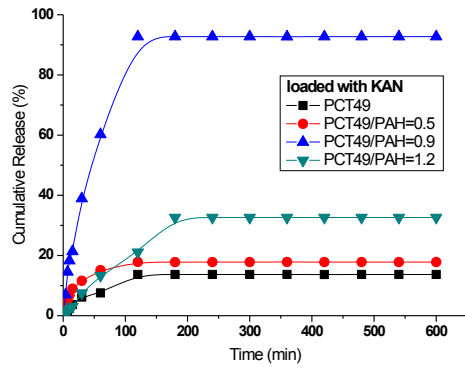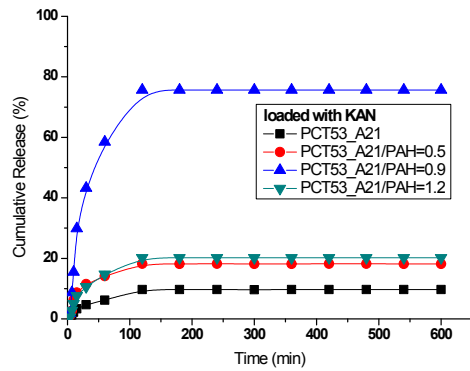

Figure 4S. STR and KAN *in-vitro* release

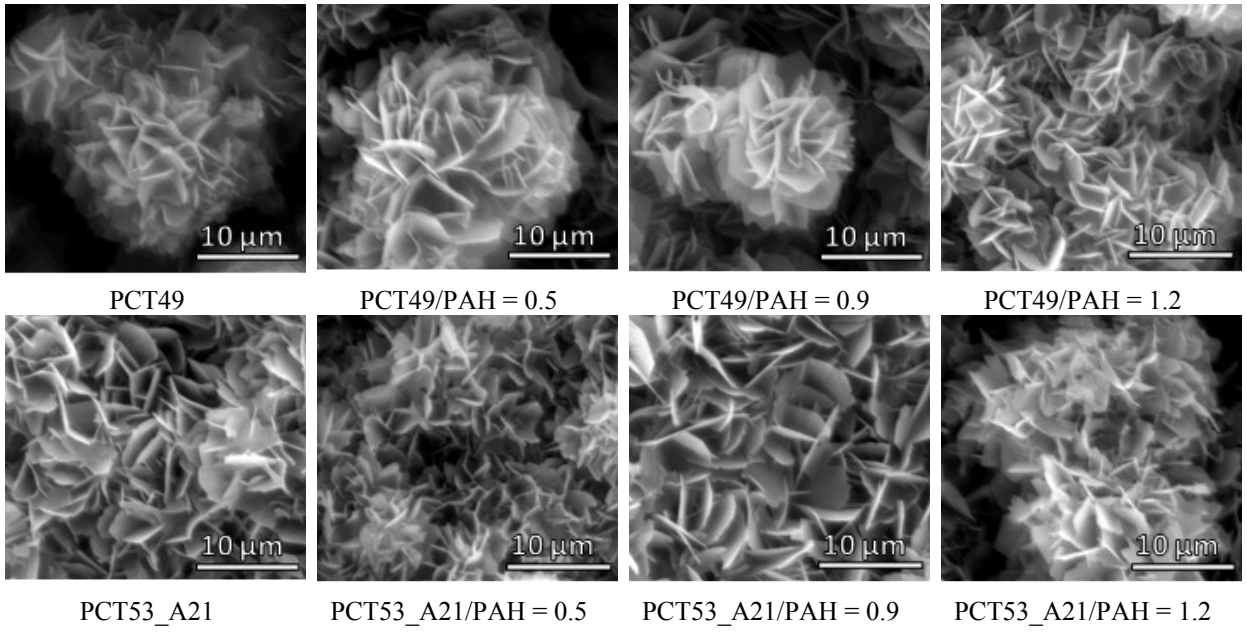

**Figure 5S.** SEM micrograph of composite microparticles after KAN release

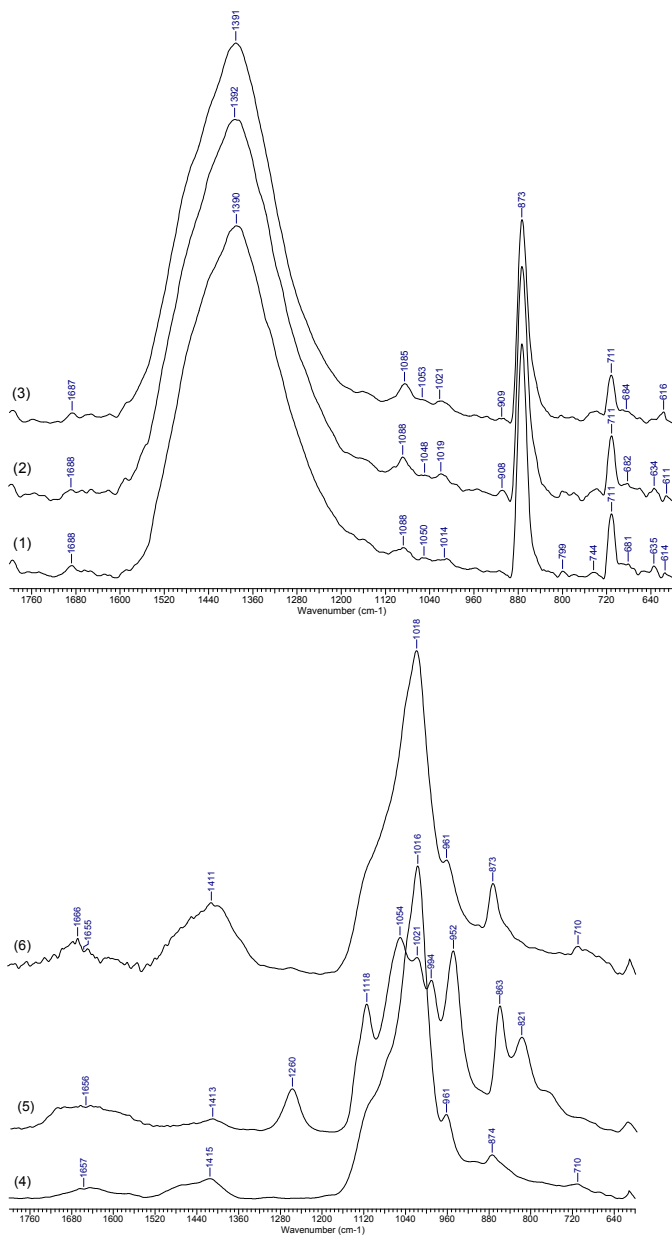

**Figure 6S.** FTIR spectra of STR loaded sample: (1) CaCO<sub>3</sub>/(PCT49/PAH=0.5), (2) CaCO<sub>3</sub>/(PCT49/PAH=0.9), (3) CaCO<sub>3</sub>/(PCT49/PAH=1.2) and after STR release: (4) CaCO<sub>3</sub>/(PCT49/PAH=0.5), (5) CaCO<sub>3</sub>/(PCT49/PAH=0.9), (6) CaCO<sub>3</sub>/(PCT49/PAH=1.2)

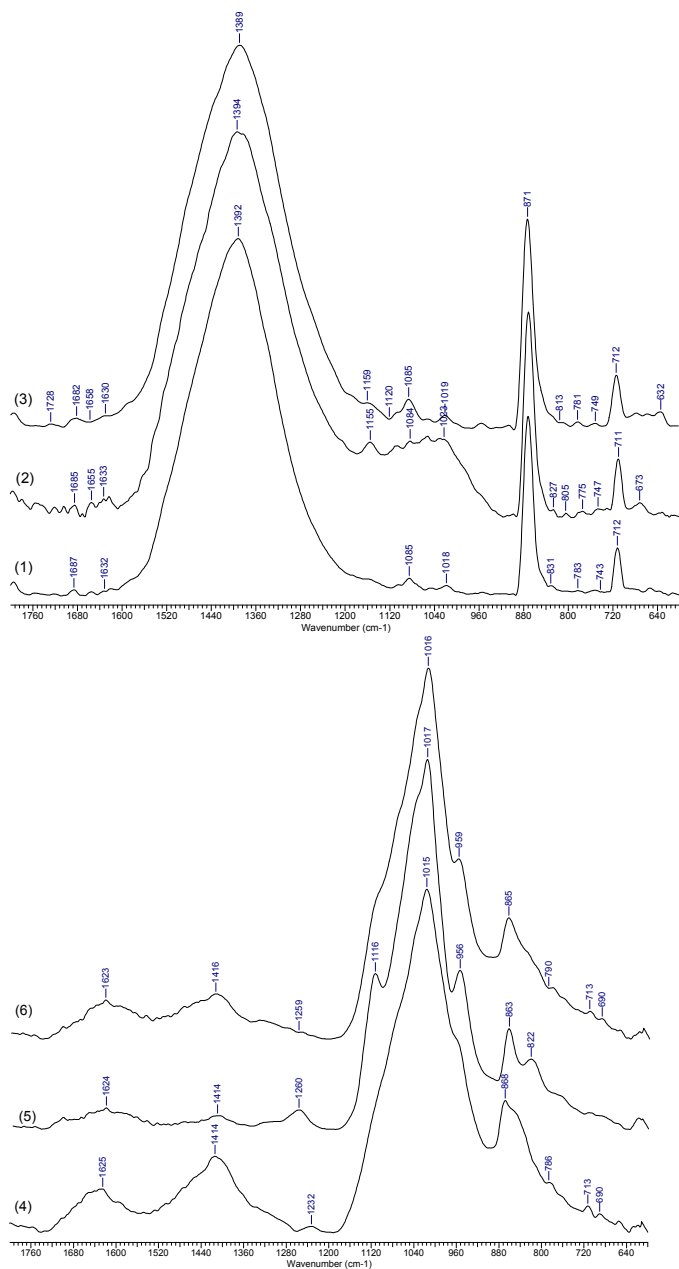

**Figure 7S.** FTIR spectra of KAN loaded sample: (1) CaCO<sub>3</sub>/(PCT49/PAH=0.5), (2) CaCO<sub>3</sub>/(PCT49/PAH=0.9), (3) CaCO<sub>3</sub>/(PCT49/PAH=1.2) and after KAN release: (4) CaCO<sub>3</sub>/(PCT49/PAH=0.5), (5) CaCO<sub>3</sub>/(PCT49/PAH=0.9), (6) CaCO<sub>3</sub>/(PCT49/PAH=1.2)



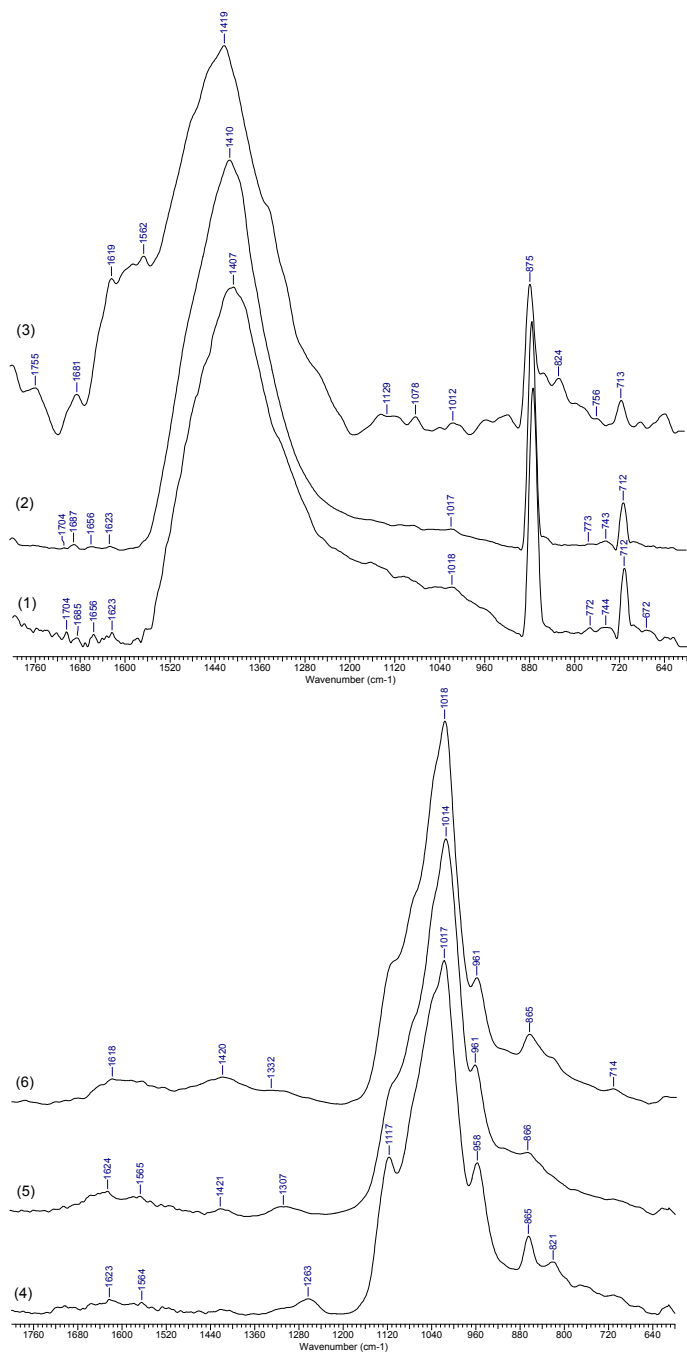

**Figure 8S.** FTIR spectra of STR loaded sample: (1) CaCO<sub>3</sub>/(PCT53\_A21/PAH=0.5), (2) CaCO<sub>3</sub>/(PCT53\_A21/PAH=0.9), (3) CaCO<sub>3</sub>/(PCT53\_A21/PAH=1.2) and after STR release: (4) CaCO<sub>3</sub>/(PCT53\_A21/PAH=0.5), (5) CaCO<sub>3</sub>/(PCT53\_A21/PAH=0.9), (6) CaCO<sub>3</sub>/(PCT53\_A21/PAH=1.2)

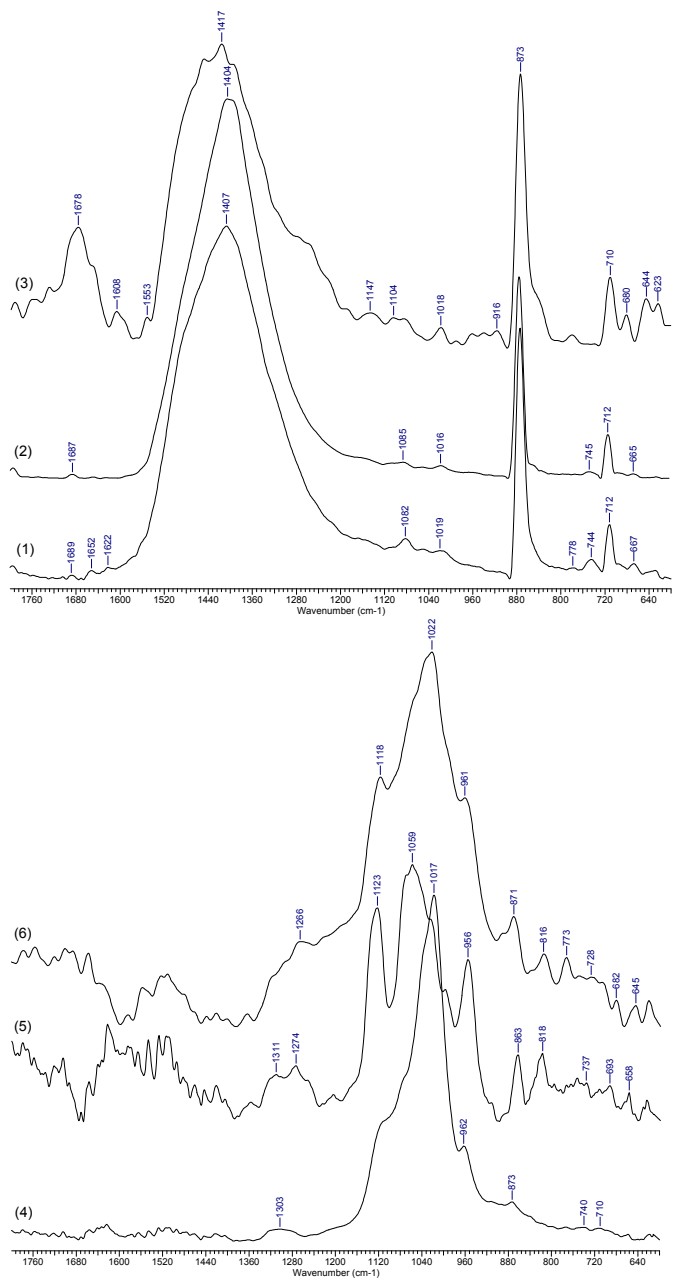

**Figure 9S.** FTIR spectra of KAN loaded sample: (1) CaCO<sub>3</sub>/(PCT53\_A21/PAH=0.5), (2) CaCO<sub>3</sub>/(PCT53\_A21/PAH=0.9), (3) CaCO<sub>3</sub>/(PCT53\_A21/PAH=1.2) and after KAN release: (4) CaCO<sub>3</sub>/(PCT53\_A21/PAH=0.5), (5) CaCO<sub>3</sub>/(PCT53\_A21/PAH=0.9), (6) CaCO<sub>3</sub>/(PCT53\_A21/PAH=1.2)

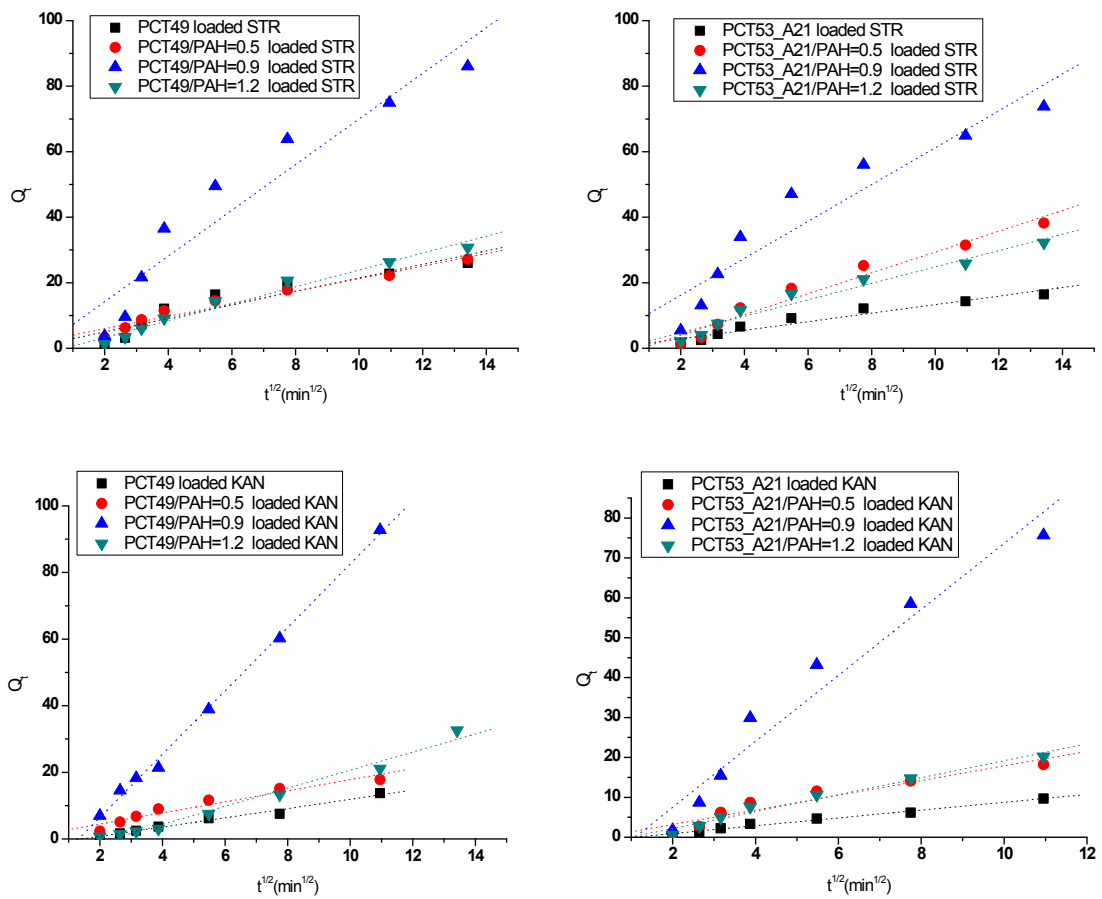

Figure 10S. Graphical representation of Higuchi equation

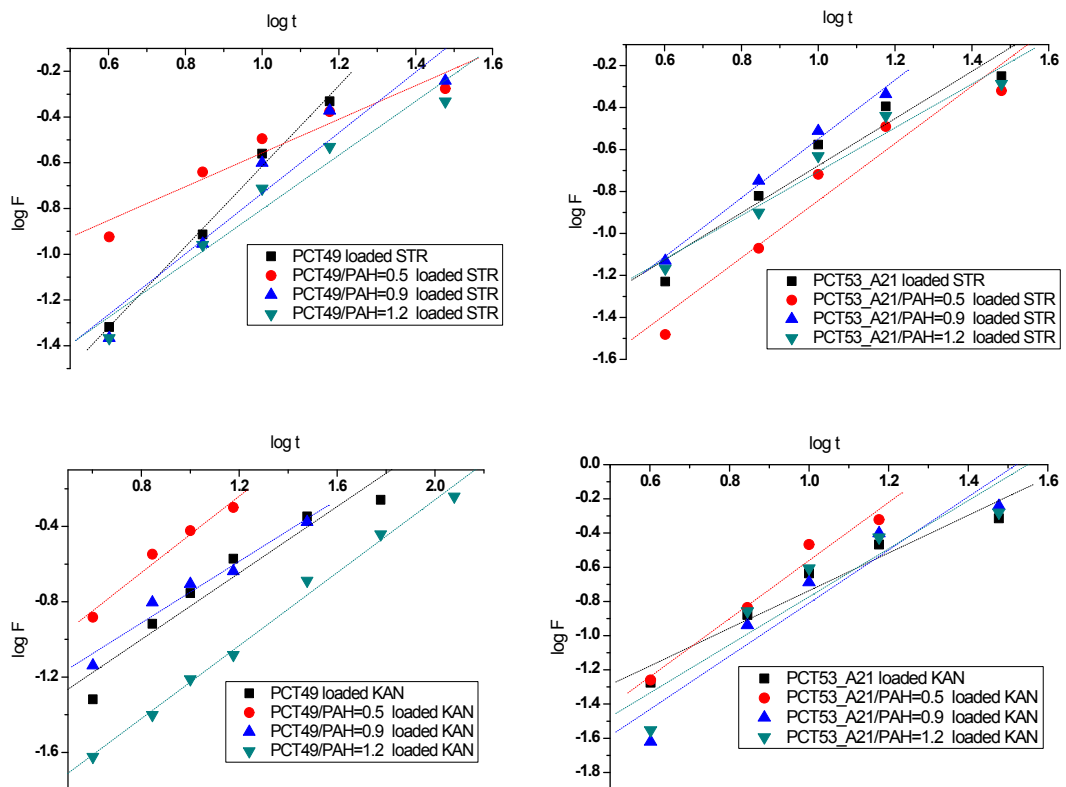

Figure 11S. Graphical representation of Korsmeyer-Peppas equation
